# Supplementary material
Source: PubMed Central journal article supplement (PMC5850735)
Supplement: dex335suppl_table1.pdf [file dex335suppl_table1.pdf]

**Supplementary Table I** Baseline characteristics of study participants and women not included in the study (2007–2014).

|                                       | Total cohort | Not included              | P value |
|---------------------------------------|--------------|---------------------------|---------|
| N                                     | 100          | 132                       |         |
| Cycles                                | 136          | 218                       |         |
|                                       |              | <b>Mean (SD) or n (%)</b> |         |
| Personal characteristics              |              |                           |         |
| Age, years                            | 34.8 (3.8)   | 35.8 (4.0)                | 0.09    |
| BMI, kg/m <sup>2</sup>                | 24.4 (4.0)   | 24.0 (4.3)                | 0.13    |
| Ever smoker, n (%)                    | 29 (29.0)    | 37 (28.0)                 | 0.88    |
| White/Caucasian, n (%)                | 82 (82.0)    | 110 (83.3)                | 0.86    |
| Moderate-to-vigorous exercise, h/week | 4.3 (4.7)    | 3.3 (3.7)                 | 0.19    |
| Multivitamin, n (%)                   | 91 (91.0)    | 113 (87.6)                | 0.52    |
| Reproductive characteristics          |              |                           |         |
| Infertility diagnosis, n (%)          |              |                           | 0.35    |
| Male factor                           | 35 (35.0)    | 46 (34.8)                 |         |
| Female factor                         | 24 (24.0)    | 42 (31.8)                 |         |
| Unexplained                           | 41 (41.0)    | 44 (33.3)                 |         |
| Treatment protocol, n (%)             |              |                           | 0.40    |
| Follicular phase GnRH antagonist      | 10 (10.0)    | 12 (9.1)                  |         |
| Follicular phase GnRH agonist         | 9 (9.0)      | 20 (15.2)                 |         |
| Luteal phase GnRH agonist             | 81 (81.0)    | 100 (75.8)                |         |
| Day 3 FSH, IU/L                       | 7.0 (2.0)    | 7.6 (3.2)                 | 0.27    |

P values were based on Kruskal–Wallis test (for continuous variable) or Fisher's exact test (for categorical variables).
