# Supplementary material
Source: PubMed Central journal article supplement (PMC5850735)
Supplement: dex335suppl_table2.pdf [file dex335suppl_table2.pdf]

**Supplementary Table II Adjusted risk ratios (95% CI) of clinical outcomes per initiated treatment cycle for every 1 increase in serum fatty acid concentrations in 100 women, restricting the analysis to the first fresh cycle only.**

| Serum fatty acids                | Implantation                                                    | Clinical pregnancy | Live birth        |
|----------------------------------|-----------------------------------------------------------------|--------------------|-------------------|
|                                  | RR <sup>1</sup> (95% CI) per 1% increase in serum concentration |                    |                   |
| 18:3 ω-3 ALA                     | 0.64 (0.30, 1.40)                                               | 0.51 (0.21, 1.23)  | 0.39 (0.13, 1.22) |
| 20:5 ω-3 EPA                     | 1.08 (0.79, 1.50)                                               | 1.12 (0.78, 1.59)  | 1.16 (0.76, 1.77) |
| 22:5 ω-3 DPA                     | 0.96 (0.25, 3.65)                                               | 0.89 (0.20, 3.87)  | 1.22 (0.21, 7.06) |
| 22:6 ω-3 DHA                     | 1.11 (0.91, 1.34)                                               | 1.06 (0.86, 1.31)  | 1.15 (0.88, 1.50) |
| Long chain <sup>2</sup>          | 1.04 (0.9, 1.19)                                                | 1.06 (0.93, 1.21)  | 1.10 (0.93, 1.31) |
| ω-3 PUFA <sup>2</sup>            | 1.05 (0.93, 1.19)                                               | 1.04 (0.91, 1.19)  | 1.10 (0.92, 1.30) |
| 18:2 ω-6 LA                      | 0.98 (0.94, 1.04)                                               | 1.01 (0.96, 1.07)  | 0.97 (0.89, 1.04) |
| 20:4 ω-6 AA                      | 1.05 (0.94, 1.18)                                               | 1.12 (1.00, 1.27)  | 1.11 (0.95, 1.29) |
| ω-6 PUFA                         | 1.00 (0.95, 1.04)                                               | 1.03 (0.98, 1.08)  | 1.00 (0.94, 1.07) |
| Ratio of ω-6 to ω-3 <sup>2</sup> | 1.03 (0.86, 1.24)                                               | 1.06 (0.82, 1.35)  | 1.03 (0.80, 1.34) |
| Ratio of LA to ALA <sup>2</sup>  | 1.00 (0.96, 1.04)                                               | 1.00 (0.96, 1.04)  | 1.01 (0.96, 1.07) |
| Total PUFA                       | 1.00 (0.96, 1.04)                                               | 1.03 (0.98, 1.09)  | 1.02 (0.95, 1.09) |

AA, arachidonic acid; ALA, alpha linolenic acid; DHA, decosahexaenoic acid; DPA, docosapentaenoic acid; EPA, eicosapentaenoic acid; LA, linoleic acid, PUFA, polyunsaturated fatty acids; RR, risk ratio.

<sup>1</sup>Adjusted for age, BMI, smoking status, moderate-to-vigorous physical activity, use of multivitamins and history of live birth.

<sup>2</sup>All the *P* values >0.05 in these tables, including AA and clinical pregnancy (*P* = 0.06).
