# Supplementary material
Source: PubMed Central journal article supplement (PMC5850735)
Supplement: dex335suppl_table3.pdf [file dex335suppl_table3.pdf]

**Supplementary Table III Adjusted changes in preclinical outcomes for every one increase in serum PUFA concentrations in 100 women, restricting the analysis to the first fresh cycle only.**

|                                  | Peak estradiol                                                      | Total oocytes                                              | MII oocytes        | Fertilization <sup>†</sup> | Probability of ≥ 1 good embryo <sup>†</sup> quality (%) |
|----------------------------------|---------------------------------------------------------------------|------------------------------------------------------------|--------------------|----------------------------|---------------------------------------------------------|
|                                  | Absolute difference (pmol/L) per 1 increase in serum concentrations | Relative difference per 1 increase in serum concentrations |                    |                            |                                                         |
| 18:3 ω-3 ALA                     | -467 (-1189, 255)                                                   | 0.6 (-23.4, 32.2)                                          | 2.0 (-24.3, 37.5)  | -21.7 (-45.2, 11.9)        | -35.1 (-72.2, 51.6)                                     |
| 20:5 ω-3 EPA                     | -93 (-265, 79)                                                      | -8 (-14.8, -0.6)                                           | -6.4 (-13.8, 1.6)  | 1.9 (-8.3, 13.1)           | -2.5 (-23.1, 23.6)                                      |
| 22:5 ω-3 DPA                     | -458 (-1577, 662)                                                   | -6 (-38.3, 43.1)                                           | -3.4 (-39.0, 52.9) | 24.9 (-28.6, 119)          | -75.4 (-95.4, 30.5)                                     |
| 22:6 ω-3 DHA                     | 18 (-160, 195)                                                      | -4.9 (-11.2, 1.8)                                          | -3.4 (-10.4, 4.1)  | 2.0 (-7.1, 12.0)           | -8.1 (-26.5, 14.8)                                      |
| Long chain                       | -24 (-116, 67)                                                      | -3.5 (-7.1, 0.1)                                           | -2.7 (-6.5, 1.3)   | 1.2 (-3.8, 6.5)            | -4.0 (-16.9, 10.9)                                      |
| Total ω-3 PUFA                   | -32 (-123, 60)                                                      | -3.5 (-7.1, 0.1)                                           | -2.7 (-6.5, 1.3)   | 0.7 (-4.3, 6.0)            | -4.8 (-18.0, 10.6)                                      |
| 18:2 ω-6 LA                      | 4 (-39, 47)                                                         | -2.1 (-3.6, -0.5)                                          | -1.9 (-3.7, -0.2)  | -1.1 (-3.2, 1.0)           | -3.0 (-7.6, 1.9)                                        |
| 20:4 ω-6 AA                      | 50 (-36, 137)                                                       | 1.6 (-1.6, 5.0)                                            | 1.9 (-1.7, 5.6)    | -0.6 (-4.7, 3.6)           | 6.9 (-2.1, 16.8)                                        |
| Total ω-6 PUFA                   | 12 (-24, 49)                                                        | -1.1 (-2.4, 0.3)                                           | -1.0 (-2.5, 0.5)   | -0.8 (-2.6, 0.9)           | -0.9 (-4.7, 3.0)                                        |
| Ratio of ω-6 to ω-3 <sup>2</sup> | -127 (-244, -9)                                                     | -4.6 (-9.5, 0.7)                                           | -3.4 (-8.7, 2.2)   | 0.6 (-6.0, 7.7)            | 2.8 (-3.9, 10.0)                                        |
| Ratio of LA to ALA <sup>3</sup>  | 20 (-11, 50)                                                        | 0 (-1.2, 1.1)                                              | 0.5 (-0.8, 1.7)    | 0.2 (-1.2, 1.7)            | 1.0 (-2.1, 4.1)                                         |
| Total PUFA                       | 7 (-28, 42)                                                         | -1.4 (-2.7, -0.1)                                          | -1.3 (-2.7, 0.2)   | -0.7 (-2.3, 1.0)           | -1.4 (-4.9, 2.1)                                        |

AA, arachidonic acid; ALA, alpha linolenic acid; DHA, decosahexaenoic acid; DPA, docosapentaenoic acid; EPA, eicosapentaenoic acid; LA, linoleic acid; PUFA, polyunsaturated fatty acids.

<sup>1</sup>Adjusted for age, BMI, smoking status, moderate-to-vigorous physical activity, use of multivitamins and history of live birth.

<sup>2</sup>Additional adjusted for ω-6 and ω-3 PUFA concentrations.

<sup>3</sup>Additional adjusted for LA and ALA concentrations.

<sup>†</sup>Modified Poisson model was used to model fertilization given the weighted GEE log binomial models do not converge.
